# Supplementary material
Source: PubMed Central journal article supplement (PMC9398044)
Supplement: 40261_2022_1191_MOESM1_ESM.pdf [file 40261_2022_1191_MOESM1_ESM.pdf]

## Supplementary Material

**Journal name: Clinical Drug Investigation**

**Article title: Active Safety Surveillance of Four Types of COVID-19 Vaccines: a National Study From Jordan**

**Short title: Safety of Four Types of COVID-19 Vaccines**

**Derar H. Abdel-Qader<sup>1,2\*</sup>**, Hasan Abdel-Qader<sup>3</sup>, Jennifer Silverthorne<sup>4</sup>, Chuenjid Kongkaew<sup>5</sup>, Ahmad Z. Al Meslamani<sup>6,7</sup>, Wail Hayajneh<sup>8,9</sup>, Osama M. Abu Ata<sup>10</sup>, Walid Shnaigat<sup>2</sup>, Salah AbuRuz<sup>11,12</sup>, Mohannad Al Nsour<sup>13</sup>, Abdallah Alhariri<sup>14</sup>, Khaldoun Shnewer<sup>14</sup>, Mohammad Da'ssan<sup>14</sup>, Nathir M. Obeidat<sup>15</sup>, Khaldoun E. Nusair<sup>16</sup>, Mothafer S. Jalamdeh<sup>17</sup>, Feras Hawari<sup>3</sup>, Khaldoun Khader<sup>3</sup>, Tareq Hakim<sup>3</sup>, Fatima A. Hammad<sup>3</sup>, Mustafa Al Qudah<sup>3</sup>, Mohammad Asad<sup>13</sup>.

<sup>1</sup> Faculty of Pharmacy & Medical Sciences, University of Petra, Amman, Jordan.

<sup>2</sup> Al Rashid Hospital Center, Amman, Jordan.

<sup>3</sup> Ministry of Health, Amman, Jordan.

<sup>4</sup> Division of Pharmacy & Optometry, The University of Manchester, Manchester, UK.

<sup>5</sup> Department of Pharmacy Practice, Naresuan University, Thailand.

<sup>6</sup> AAU Health and Biomedical Research Center, Al Ain University, Abu Dhabi, United Arab Emirates

<sup>7</sup> College of Pharmacy, Al Ain University, Abu Dhabi, UAE.

<sup>8</sup> School of Medicine, St. Louis University, USA.

<sup>9</sup> School of Medicine, Jordan University of Science & Technology, Irbid, Jordan.

<sup>10</sup> King Hussein Cancer Center, Amman, Jordan.

<sup>11</sup> Department of Pharmacology and Therapeutics, College of Medicine and Health Sciences, The United Arab Emirates University, Al Ain, United Arab Emirates.

<sup>12</sup> Department of Clinical Pharmacy, Faculty of Pharmacy, The University of Jordan, Amman, Jordan.

<sup>13</sup> Eastern Mediterranean Public Health Network (EMPHNET), Amman, Jordan.

<sup>14</sup> Fourth Generation for Medical Laboratory, Amman, Jordan.

<sup>15</sup> School of Medicine, The University of Jordan, Amman, Jordan.

<sup>16</sup> King Abdullah University Hospital, Irbid, Jordan.

<sup>17</sup> Prince Hamza Hospital, Amman, Jordan.

**Table 1. Red flags criteria**

|                                                                             |                                                                                |                                        |
|-----------------------------------------------------------------------------|--------------------------------------------------------------------------------|----------------------------------------|
| Receiving a second dose of a vaccine that was different from the first dose | Experiencing an unsolicited adverse event that was not listed in the checklist | Having allergic reactions              |
| Experiencing an adverse event that lasted more than three days              | Experiencing fever for more than 3 days                                        | Admitted to hospital after vaccination |
| Recovered with sequelae                                                     | Experiencing moderate or severe shortness of breath                            | Death                                  |





1

2 **Table 3. Overall predictors for adverse events.**

| <b>Independent variables (variables VS reference)</b>             | <b>AOR</b> | <b>95% CI for AORs</b> |       | <b>P values</b> |
|-------------------------------------------------------------------|------------|------------------------|-------|-----------------|
| Age ( $\geq 65$ years Vs $< 65$ years)                            | 0.437      | 0.425                  | 0.449 | 0.001           |
| Gender (male Vs females)                                          | 0.500      | 0.459                  | 0.505 | 0.013           |
| Previous COVID-19 infection (infected Vs not infected)            | 1.181      | 1.168                  | 1.195 | 0.005           |
| Influenza vaccine (vaccinated Vs not vaccinated)                  | 1.143      | 1.121                  | 1.166 | 0.001           |
| Drug sensitivity (sensitive to a drug Vs not sensitive to a drug) | 1.557      | 1.518                  | 1.597 | 0.005           |
| Food sensitivity (sensitive to food Vs not sensitive to food)     | 1.774      | 1.720                  | 1.830 | 0.023           |
| Smoking (smoker Vs not smoker)                                    | 1.139      | 1.126                  | 1.153 | 0.001           |

3

4

5

6 **Table 4. Predictors for adverse events reported by individuals who received BNT162b2 vaccine.**

7

| <b>Independent variables (variables VS reference)</b>             | <b>AOR</b> | <b>95% CI for AORs</b> |       | <b>P values</b> |
|-------------------------------------------------------------------|------------|------------------------|-------|-----------------|
| Age ( $\geq 65$ years Vs $< 65$ years)                            | 0.483      | 0.464                  | 0.502 | 0.003           |
| Gender (male Vs females)                                          | 0.580      | 0.573                  | 0.587 | 0.001           |
| Previous COVID-19 infection (infected Vs not infected)            | 1.379      | 1.360                  | 1.399 | 0.002           |
| Influenza vaccine (vaccinated Vs not vaccinated)                  | 1.058      | 1.030                  | 1.087 | 0.004           |
| Drug sensitivity (sensitive to a drug Vs not sensitive to a drug) | 1.691      | 1.629                  | 1.755 | 0.003           |
| Food sensitivity (sensitive to food Vs not sensitive to food)     | 1.887      | 1.811                  | 1.967 | 0.018           |
| Smoking (smoker Vs not smoker)                                    | 1.141      | 1.125                  | 1.158 | 0.008           |

8

9

10

11

12

13

14

15 **Table 5. Predictors for adverse events reported by individuals who received BBIBP-CorV**  
 16 **vaccine.**

| Independent variables (variables VS reference)                    | AOR   | 95% CI for AORs |       | P values |
|-------------------------------------------------------------------|-------|-----------------|-------|----------|
| Age ( $\geq 65$ years Vs $< 65$ years)                            | 1.969 | 1.866           | 2.078 | 0.004    |
| Gender (male Vs females)                                          | 2.014 | 1.971           | 2.057 | 0.001    |
| Previous COVID-19 infection (infected Vs not infected)            | 0.867 | 0.845           | 0.889 | 0.001    |
| Influenza vaccine (vaccinated Vs not vaccinated)                  | 0.896 | 0.857           | 0.938 | 0.001    |
| Drug sensitivity (sensitive to a drug Vs not sensitive to a drug) | 0.498 | 0.477           | 0.520 | 0.001    |
| Food sensitivity (sensitive to food Vs not sensitive to food)     | 0.514 | 0.485           | 0.520 | 0.028    |
| Smoking (smoker Vs not smoker)                                    | 1.142 | 1.108           | 1.177 | 0.007    |

17

18

19 **Table 6. Predictors for adverse events reported by individuals who received ChAdOx1**  
 20 **nCoV-19 vaccine.**

| Independent variables (variables VS reference)                    | AOR   | 95% CI for AORs |       | P values |
|-------------------------------------------------------------------|-------|-----------------|-------|----------|
| Age ( $\geq 65$ years Vs $< 65$ years)                            | 2.434 | 2.271           | 2.608 | 0.001    |
| Gender (male Vs females)                                          | 2.546 | 2.483           | 2.611 | 0.001    |
| Previous COVID-19 infection (infected Vs not infected)            | 0.886 | 0.852           | 0.920 | 0.001    |
| Influenza vaccine (vaccinated Vs not vaccinated)                  | 1.834 | 1.691           | 1.982 | 0.801    |
| Drug sensitivity (sensitive to a drug Vs not sensitive to a drug) | 0.698 | 0.427           | 0.821 | 0.001    |
| Food sensitivity (sensitive to food Vs not sensitive to food)     | 0.414 | 0.385           | 0.638 | 0.028    |
| Smoking (smoker Vs not smoker)                                    | 1.325 | 1.112           | 1.502 | 0.001    |

21

22

23

24

25

26

27

28 **Table 7. Predictors for adverse events reported by individuals who received Sputnik V**  
 29 **vaccine.**

| <b>Independent variables (variables VS reference)</b>             | <b>AOR</b> | <b>95% CI for AORs</b> |       | <b>P values</b> |
|-------------------------------------------------------------------|------------|------------------------|-------|-----------------|
| Previous COVID-19 infection (infected Vs not infected)            | 0.696      | 0.527                  | 0.918 | 0.010           |
| Drug sensitivity (sensitive to a drug Vs not sensitive to a drug) | 0.318      | 0.125                  | 0.811 | 0.016           |
| Foor sensitivity (sensitive to food Vs not sensitive to food)     | 0.234      | 0.094                  | 0.583 | 0.024           |
| Smoking (smoker Vs not smoker)                                    | 1.102      | 1.017                  | 1.366 | 0.014           |

30

31

32

33
